# Supplementary material for: Support morphology and crystal plane effect of Cu/CeO2 nanomaterial on the physicochemical and catalytic properties for carbonate hydrogenation
Source: Royal Society of Chemistry journal article supplement (doi:10.1039/c6cy01575a), 2016-01-01
Supplement: c6cy01575a1.pdf [file c6cy01575a1.pdf]

## Electronic Supporting Information (ESI)

### Support Morphology and Crystal-plane Effect of Cu/CeO<sub>2</sub> Nano-Material on the Physicochemical and Catalytic Properties for Carbonate Hydrogenation

Table S1 Physicochemical properties of different morphologies ceria

| Catalyst             | S <sub>BET</sub><br>(m <sup>2</sup> /g) | V <sub>pore</sub><br>(cm <sup>3</sup> /g) | D <sub>pore</sub><br>(nm) |
|----------------------|-----------------------------------------|-------------------------------------------|---------------------------|
| CeO <sub>2</sub> -NR | 86.3                                    | 0.56                                      | 25.2                      |
| CeO <sub>2</sub> -NP | 138.8                                   | 0.19                                      | 6.1                       |
| CeO <sub>2</sub> -NC | 8.5                                     | 0.06                                      | 34.5                      |

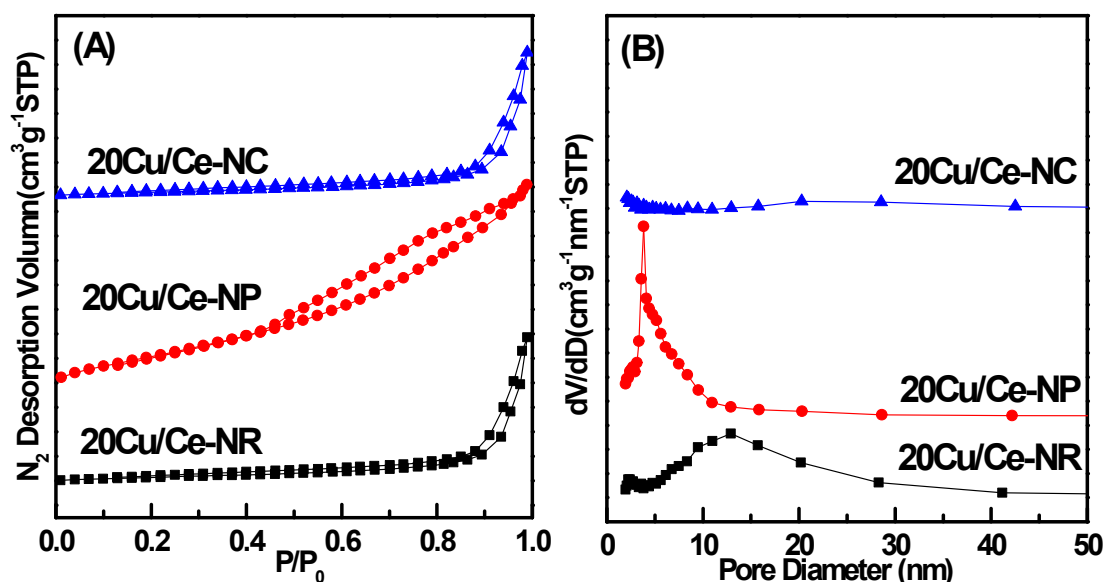

Fig. S1† N<sub>2</sub> adsorption-desorption isotherms and BJH pore size distribution of the calcined catalysts.

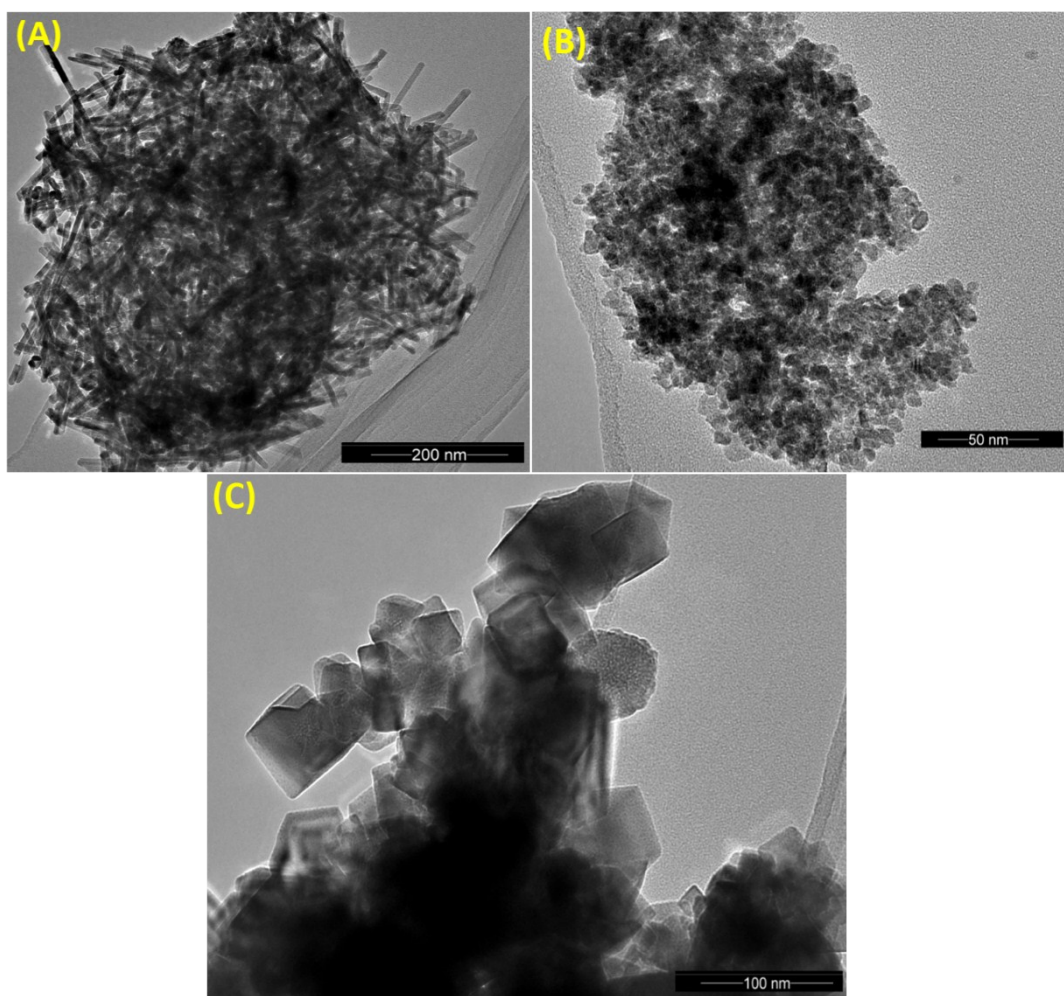

**Fig. S2†** HRTEM images of 20Cu/Ce-NR (A), 20Cu/Ce-NP (B) and 20Cu/Ce-NC (C).

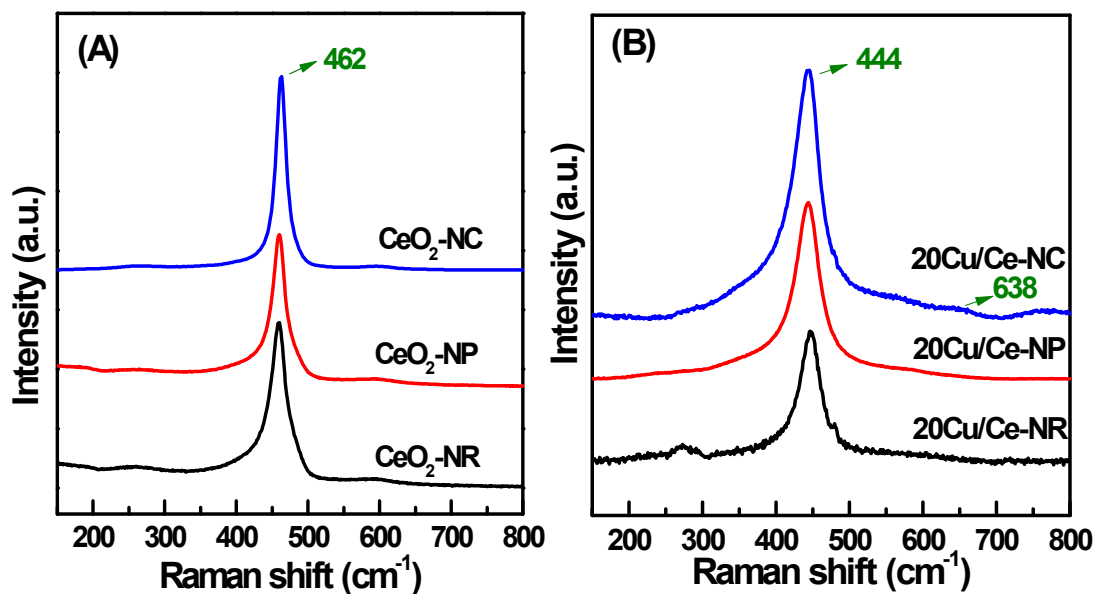

Fig. S3† Raman spectra of various CeO<sub>2</sub> (A) and 20Cu/CeO<sub>2</sub> samples (B).

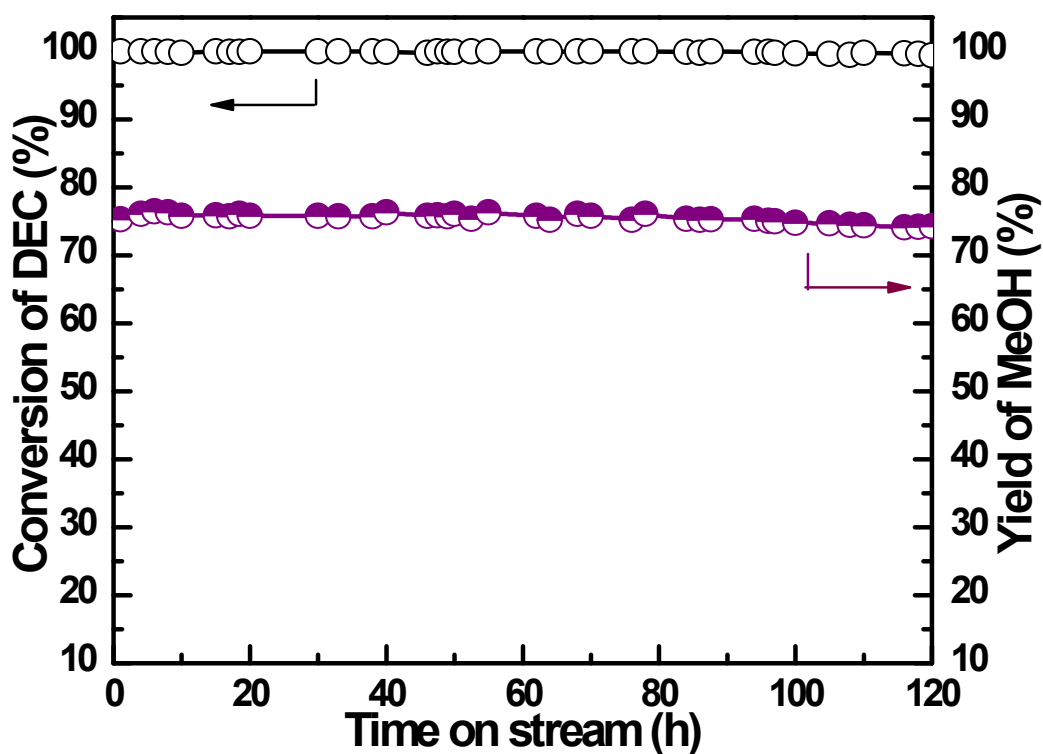

Fig. S4† Long time catalytic test results of 20Cu/Ce-NR. Reaction condition: P=2.5

MPa, T=503 K, H<sub>2</sub>/DEC=190 (mol/mol), LHSV=0.4 h<sup>-1</sup>.

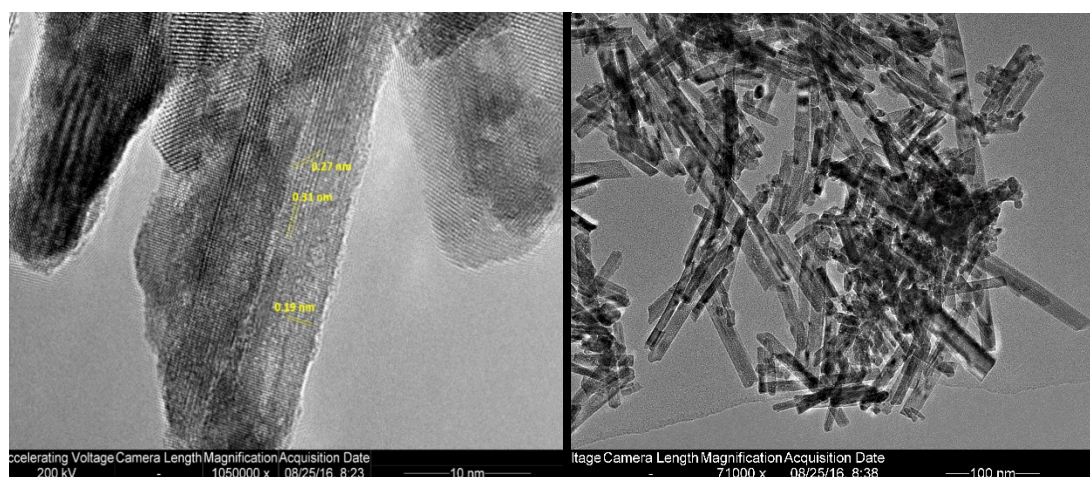

**Fig. S5†** HRTEM images of 20Cu/Ce-NR catalysts after the 1st run
